# Supplementary material for: Plasmonic O2 dissociation and spillover expedite selective oxidation of primary C–H bonds
Source: Royal Society of Chemistry journal article supplement (doi:10.1039/d1sc04632b), 2021-01-01
Supplement: d1sc04632b1.pdf [file d1sc04632b1.pdf]

## Supplementary Information for

### Plasmonic O<sub>2</sub> Dissociation and Spillover Expedite Selective Oxidation of Primary C–H Bonds

Hao Li,<sup>[a,b]</sup> Huan Shang,<sup>[c]</sup> Fuze Jiang,<sup>[a,b]</sup> Xingzhong Zhu,<sup>[d]</sup> Qifeng Ruan,<sup>[e]</sup> Lizhi Zhang,<sup>[c]</sup> and Jing Wang\*<sup>[a,b]</sup>

<sup>[a]</sup>Institute of Environmental Engineering, ETH Zürich, Zürich 8093, Switzerland

<sup>[b]</sup>Laboratory for Advanced Analytical Technologies, Empa, Swiss Federal Laboratories for Materials Science and Technology, Dübendorf 8600, Switzerland

<sup>[c]</sup>Laboratory of Pesticide & Chemical Biology of Ministry of Education, Institute of Applied & Environmental Chemistry, College of Chemistry, Central China Normal University, Wuhan 430079, China

<sup>[d]</sup>College of Science, Nanjing University of Aeronautics and Astronautics, Nanjing 210016, China

<sup>[e]</sup>Engineering Product Development, Singapore University of Technology and Design, Singapore 487372, Singapore

**20 pages, 18 Figures, 5 tables**

## Supplementary Methods

**Characterization methods.** The powder X-ray diffraction (XRD) patterns of the samples were recorded on a Bruker D8 Advance diffractometer with monochromatized Cu K $\alpha$  radiation ( $\lambda = 0.15418$  nm). The morphology of the samples was observed with a JEOL 6700-F field-emission scanning electron microscope (SEM). The transmission electron microscopy (TEM) images were obtained by JEOL JSM-2010 high-resolution transmission electron microscopy. High-angular annular dark field-scanning transmission electron microscopy (STEM-HAADF) and energy dispersive X-ray (EDX) mapping images were obtained via JEOL, JEM-ARM200F. Chemical states were analyzed using X-ray photoelectron spectroscopy (XPS) (Thermo Scientific ESCLAB 250Xi). All binding energies were referenced to the C 1s peak (284.6 eV) arising from the adventitious carbon. UV-visible diffused reflectance spectra of the samples were obtained for the dry-pressed film samples with using a UV-visible spectrophotometer (UV-2550, Shimadzu, Japan) with BaSO<sub>4</sub> as the reflectance standard. Electron paramagnetic resonance (EPR) spectra were conducted on a Bruker EMX EPR Spectrometer (Billerica, MA). Steady-state and time-resolved photoluminescence (PL) measurements were carried out on an FLS900 fluorometer (Edinburgh Instruments). The X-ray absorption near-edge structure (XANES) spectra and extended X-ray absorption fine structure (EXAFS) were performed at the beamline 1W1B of Beijing Synchrotron Radiation Facility, Institute of High Energy Physics, Chinese Academy of Sciences. O<sub>2</sub>-temperature-programmed desorption experiments (TPD) was carried out by AutoChem II 2920 (Micromeritics, USA). In a typical process, all the samples were pre-treated by high-purity He to remove adsorbed oxygen species. The system for steady-state and transient surface photovoltage (SPV) measurements included a source of monochromatic light, a lock-in amplifier (SR830-DSP) with a light chopper (SR540), a photovoltaic cell, and a computer. The samples were examined without further treatment during the SPV measurements, and the contact between the sample and the ITO electrode was non-ohmic.

**First-Principles Density of Functional Theory (DFT) Calculation.** All calculations were obtained by the density of functional theory (DFT) +  $U$ , utilizing the Vienna Ab-initio Simulation Package (VASP), in which the exchange-correlation energy functional was described by GGA-PBE.<sup>1,2</sup> The plane wave basis with 400 eV energy cutoff was employed for the valence electronic states expansion which was conducted by the projector augmented-wave (PAW) method.<sup>3,4</sup> The Hubbard  $U$  for Ti was 3 eV.<sup>5,6</sup> The k-points for Brillouin zone was  $3 \times 3 \times 1$ . The vacuum was kept at 20 Å for all the models. The force and energy of the geometrical optimization were converged to 0.02 eV/Å and  $10^{-5}$  eV/atom respectively. Location of

the transition states (TS) was determined by nudged elastic band (NEB) method.<sup>7</sup> Molecular O<sub>2</sub> adsorption was evaluated by adsorption energy, which was described by  $\Delta E_{\text{ad}}$  ( $\Delta E_{\text{ad}} = E(\text{catalyst-O}_2) - E(\text{catalyst}) - E(\text{O}_2)$ ).

**Finite-difference-time-domain (FDTD) simulation.** FDTD simulation were performed using FDTD Solution 8.24 (Lumerical Solution). During the simulation, an electromagnetic pulse in the spectral range from 20 nm to 1100 nm was launched into a box containing the target nanostructure. A mesh size of 0.1 nm was employed in calculating the extinction spectra and charge distribution contours of the Ru nanosphere and Ru nanosphere-TiO<sub>2</sub>. The refractive index of the surrounding medium was 1.33 of water. The dielectric function of Ru and TiO<sub>2</sub> were extracted from the D. W. Lynch et al. and M. W. Ribarsky et al., respectively.<sup>8,9</sup> The diameter of the Ru sphere was set to be 2 nm. The size of the TiO<sub>2</sub> was set as 5×5×2 nm. The Ru sphere with diameter of 2 nm were set on the middle surface of TiO<sub>2</sub> without gap.

Supplementary Figures

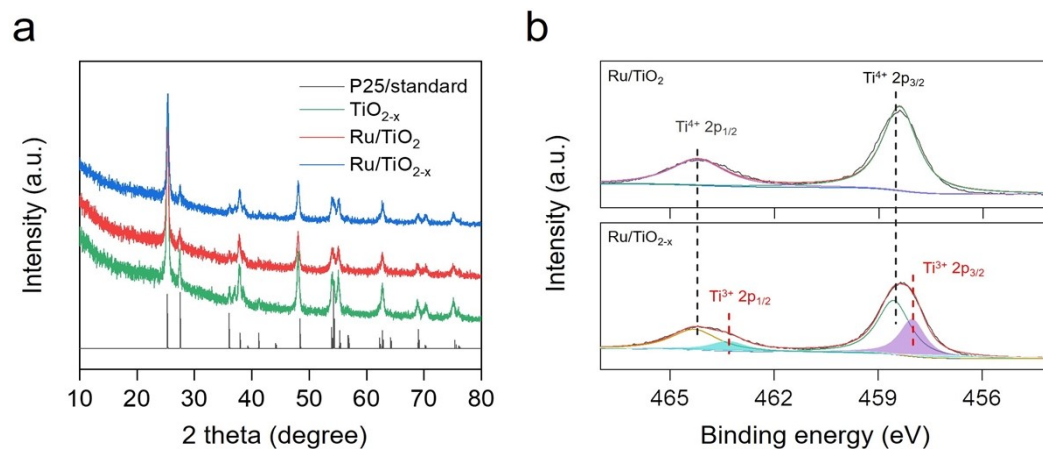

Fig. S1 (a) XRD pattern and (b) XPS spectra of the as-prepared photocatalysts.

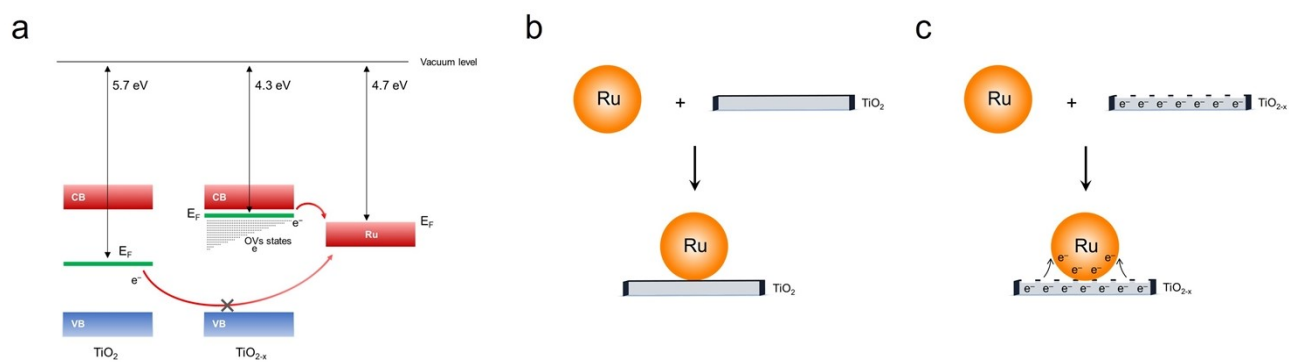

Fig. S2 (a) Schematic illustration of the band energy alignment and Fermi level ( $E_F$ ) of Ru,  $\text{TiO}_2$  and  $\text{TiO}_{2-x}$ . Schematic illustration of the interfacial charge transfer of (b)  $\text{Ru}/\text{TiO}_2$  and (c)  $\text{Ru}/\text{TiO}_{2-x}$ .

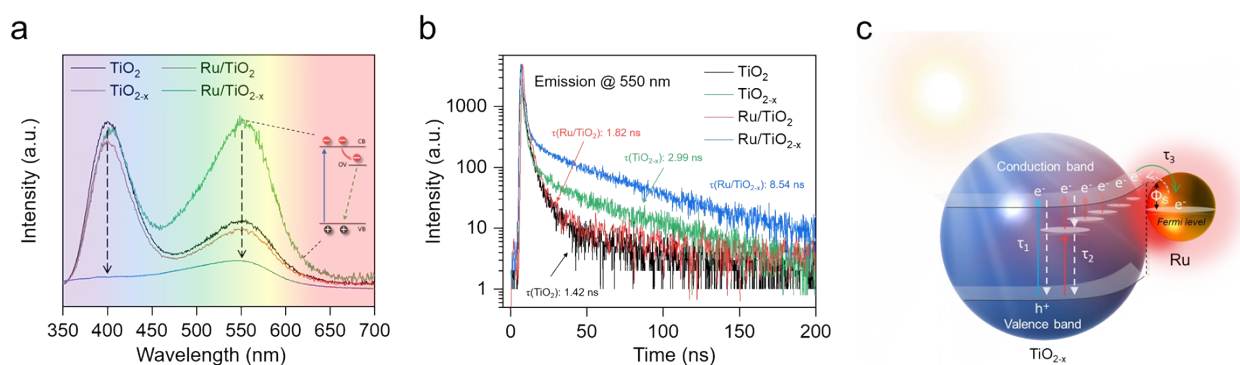

**Fig. S3** (a) Steady-state and (b) time-resolved PL spectra (@550 nm) of the as-prepared photocatalysts. (c) Schematic illustration of charge carrier kinetics at the Ru-TiO<sub>2-x</sub> interface. Both OV and the Schottky barrier within Ru/TiO<sub>2-x</sub> would affect the generation and transportation of charge carriers that determined the efficiency of photocatalysis.

To directly characterize charge carrier dynamics, informative photoluminescence (PL) spectroscopy was adopted. Under the excitation of a 300 nm laser, steady-state PL of TiO<sub>2</sub> displayed two emission peaks (Fig. S3a). The dominant peak at around 400 nm was the band-edge emission, while the other weaker one centered at 550 nm was from the radiative recombination of electrons trapped at OV states (~0.85 eV below the CB edge) with the holes at VB (inset of Fig. S3a).<sup>10</sup> Due to the high concentration of surface OVs on TiO<sub>2-x</sub>, the defect emission peak became comparable to the band-edge emission. After Ru deposition, PL intensity of Ru/TiO<sub>2</sub> experienced no remarkable change, while both the band-edge and OV-induced emissions of Ru/TiO<sub>2-x</sub> suffered from a substantial quenching (Fig. S3a). The PL quenching in Ru/TiO<sub>2-x</sub> possibly stemmed from a combined effect between OVs and Schottky barrier on suppressing electron-hole recombination. To validate this assumption, we performed time-resolved PL measurements on the OV emission peak. According to the decay curves, both TiO<sub>2</sub> and TiO<sub>2-x</sub> could be fitted with a double-exponential function, including a fast interband recombination decay component ( $\tau_1$ ) and a slow OV-mediated recombination decay component ( $\tau_2$ ) (Fig. S3b). Due to the efficient trapping of photoelectrons by OVs, TiO<sub>2-x</sub> displayed a much higher proportion of the long-living component ( $\tau_2$ , 68%), whose average time (2.99 ns) was therefore much longer than that of TiO<sub>2</sub> (1.42 ns) (Table S1). Ru/TiO<sub>2</sub> displayed an almost identical decay behavior to TiO<sub>2</sub>, suggesting the weak interactions between Ru and TiO<sub>2</sub>. As for Ru/TiO<sub>2-x</sub>, its decay was the slowest among the as-prepared photocatalysts (Fig. S3b). After careful fitting, we found a third exponential constant ( $\tau_3$ ) with the longest lifetime of 19.05 ns was necessary to obtain a satisfactory fit, which further lengthened the carrier lifetime to 8.54 ns (Table S1). It is to be noted that the introduction of  $\tau_3$  was essential that signified the contribution of Schottky barrier. As schematically illustrated in Fig. S3c, the energetic electrons, either on the CB or trapped on the OV states, could be transferred to Ru nanoparticles. Whereas the presence of Schottky barrier at the interface would block the back-transfer of photoelectrons, thus suppressing their direct or indirect recombination with holes (Fig. S3c).

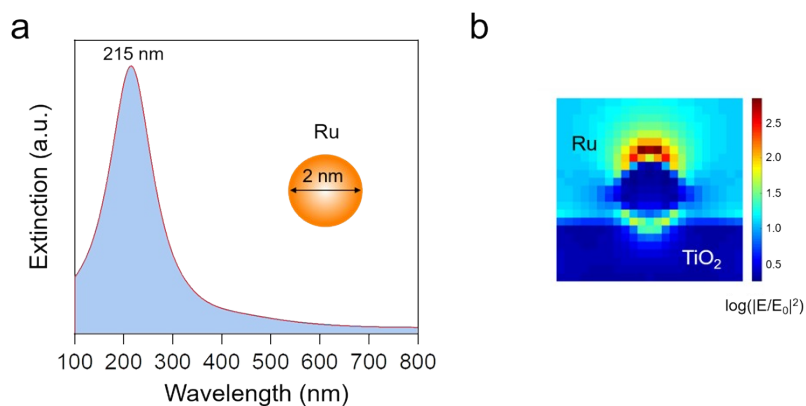

**Fig. S4** Simulated extinction spectra of a Ru nanosphere of 2 nm in diameter supported on a TiO<sub>2</sub> nanosheet of 2 nm in thickness. Inset shows the electric field intensity enhancement contours of the Ru/TiO<sub>2</sub> hybrid system.

The finite-difference time-domain (FDTD) simulations reveal that a Ru sphere (diameter of 2 nm) on TiO<sub>2</sub> displays a surface plasmon resonance (SPR) absorption ranging from 100 nm to 600 nm centered at 215 nm (Fig. S4a).<sup>11</sup> It is to be noted that our experimentally determined UV-vis absorption spectrum displays a flat and extended absorption tail in the visible light region.<sup>12</sup> This enhanced and widened absorption tail could be possibly due to the hybridization effect between the defective substrate (TiO<sub>2-x</sub>) and plasmonic metal (Ru), and also the hybridization among Ru nanoparticles.<sup>13-15</sup> Under visible light ( $\lambda = 420$  nm), Ru can generate electric field intensity enhancement several times of the incident field ( $|E/E_0|^2$ ) at the Ru-TiO<sub>2</sub> interface (Fig. S4b).

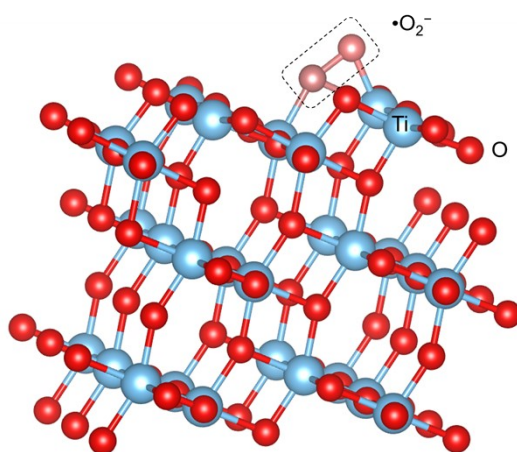

**Fig. S5** Theoretical modeling of O<sub>2</sub> adsorption on the OV of anatase(101) surface.

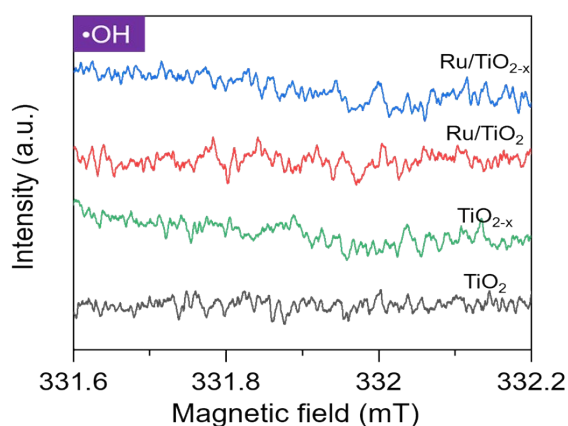

**Fig. S6** Room-temperature EPR spectra of  $\bullet\text{OH}$  in acetonitrile.

The product in Fig. S6 is a 5,5-dimethyl-1-pyrroline-*N*-oxide (DMPO) spin-trapping- $\bullet\text{OH}$  adduct, which is characterized by a four-line spectrum with relative intensities of 1 : 2 : 2 : 1. Since acetonitrile was used as the solvent, the possible generation of  $\bullet\text{OH}$  via photocatalytic water oxidation ( $\text{hole} + \text{H}_2\text{O} \rightarrow \bullet\text{OH}$ ) was ruled out.

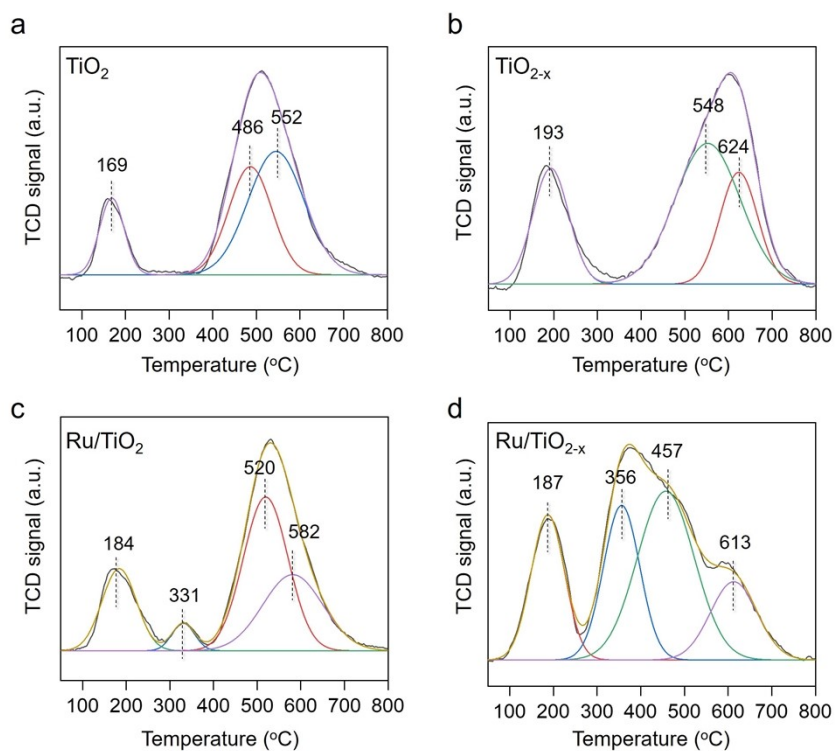

**Fig. S7** Integration of the  $\text{O}_2$ -TPD peaks of the as-prepared photocatalysts.

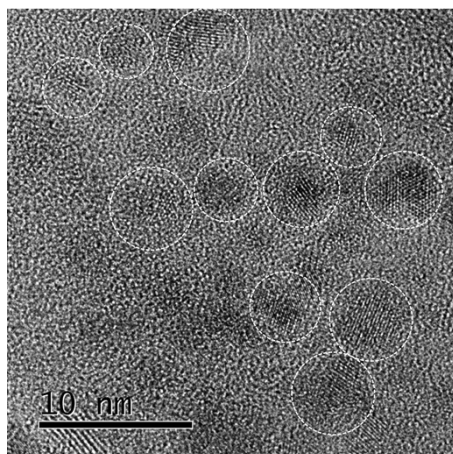

**Fig. S8** HRTEM image of Ru/SiO<sub>2</sub> which shows the deposition of crystalline Ru nanoparticles on the amorphous SiO<sub>2</sub> substrate.

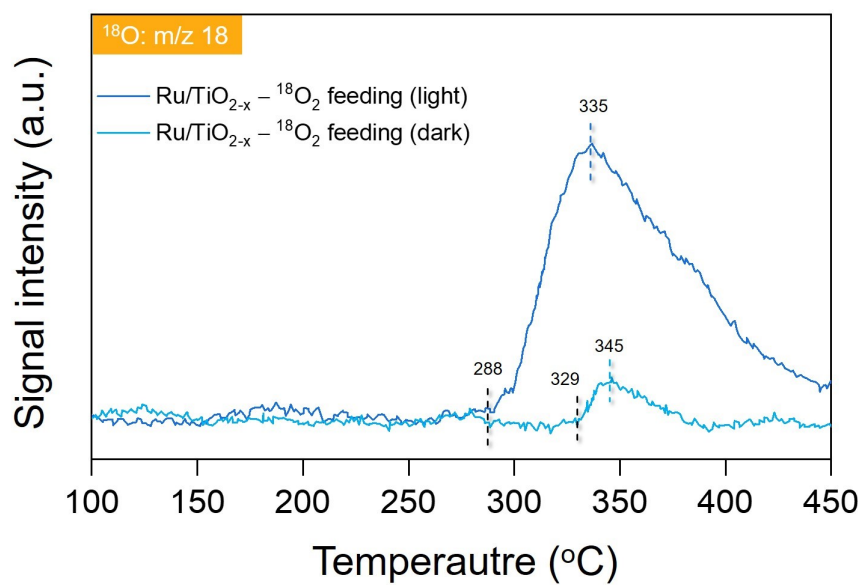

**Fig. S9** •O<sup>18</sup> mass signals of the as-prepared Ru/TiO<sub>2-x</sub> with and without visible light irradiation.



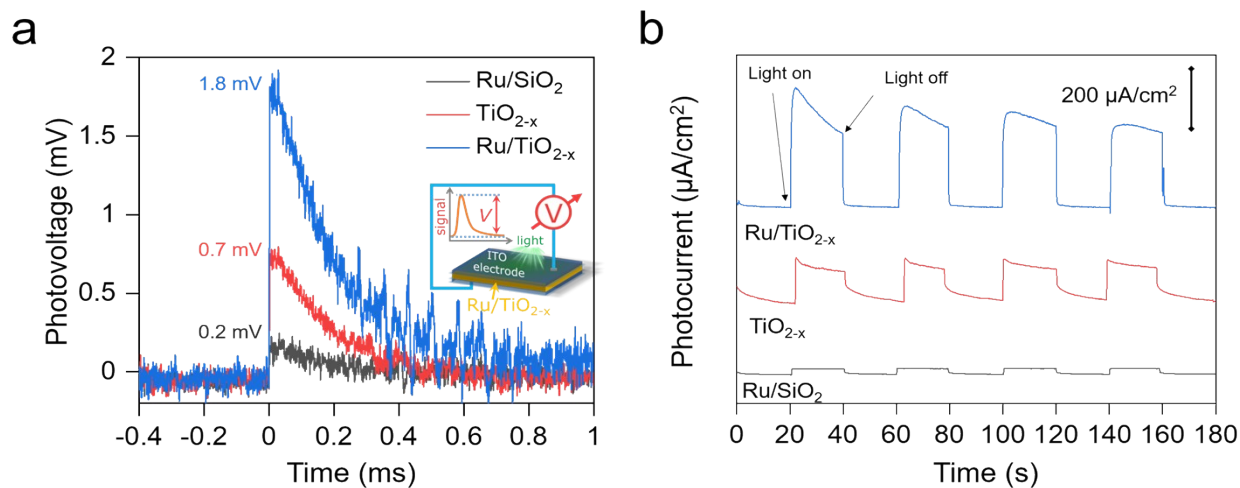

**Fig. S10** (a) Transient SPV spectra of the photocatalysts under a 420 nm laser pulse. (b) Transient photocurrent response of the photocatalysts under visible light in an electrochemical system.

We first adopted transient surface photovoltage to probe the possible generation of hot electrons on Ru nanoparticles with a 420 nm laser pulse. Compared with TiO<sub>2-x</sub> and Ru/SiO<sub>2</sub>, Ru/TiO<sub>2-x</sub> displays strongest transient photovoltage and longest lifetime (Fig. S10a), which is due to the formation of hot electrons on Ru nanoparticles when coupled to defective TiO<sub>2-x</sub>.<sup>16,17</sup>

Photocurrent measurement was conducted on CHI660D Instruments in a standard three-electrode system with the as-prepared photocatalyst as the working electrode, Pt foil as the counter electrode, saturated calomel electrode as the reference electrode and 0.5 mol/L Na<sub>2</sub>SO<sub>4</sub> aqueous solution as the electrolyte. Before the photocurrent measurement, Ar gas was purged into the Na<sub>2</sub>SO<sub>4</sub> aqueous solution to remove the dissolved molecular oxygen for 30 min and kept purging during the photocurrent measurement. A LED light (UVEC-4II, Shenzhen Lamplac Technology Co. Ltd. China) with light intensity of 2 W/cm<sup>2</sup> was utilized as a monochromatic light source ( $\lambda = 420$  nm) under a bias of +0.2 V. Similar to the surface photovoltage response, Ru/TiO<sub>2-x</sub> displays the strongest photocurrent response compared with TiO<sub>2-x</sub> and Ru/SiO<sub>2</sub>, suggesting the generation of hot electrons by Ru nanoparticles on TiO<sub>2-x</sub> (Fig. S10b).

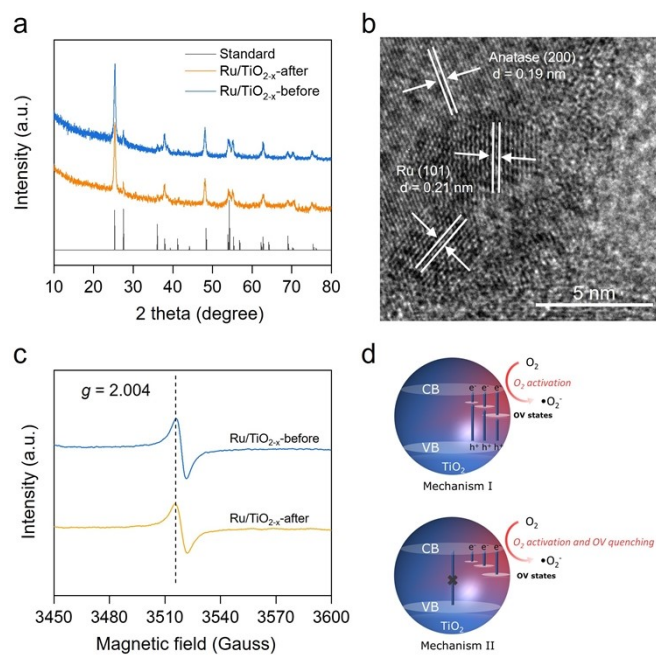

**Fig. S11** (a) XRD patterns of Ru/TiO<sub>2-x</sub> before and after multicycle photocatalytic toluene oxidation. (b) HRTEM image of Ru/TiO<sub>2-x</sub> after multicycle test. (c) EPR spectra of Ru/TiO<sub>2-x</sub> before and after multicycle test. (d) Schematic illustration of photocatalytic excitation in TiO<sub>2-x</sub>.

XRD patterns of the Ru/TiO<sub>2-x</sub> before and after multicycle photocatalytic toluene oxidation were the same, indicating Ru/TiO<sub>2-x</sub> possessed good chemical stability for photocatalytic toluene oxidation (Fig. S11a). Meanwhile, after multicycle test, TEM image showed Ru nanoparticles on TiO<sub>2-x</sub> were still in the metallic state based on the Ru(101) lattice fringes (Fig. S11b). Thus, the possible decomposition of TiO<sub>2-x</sub> support and oxidation of Ru nanoparticles were ruled out.

It is highly possible that OVs in Ru/TiO<sub>2-x</sub> were gradually oxidized during photocatalytic toluene oxidation. Based on the EPR spectra, OVs in Ru/TiO<sub>2-x</sub> after multicycle test were slightly decreased (Fig. S11c). There are two mechanisms associated with the excitation of OVs in TiO<sub>2</sub>. First, photoelectrons can be excited from the valence band of TiO<sub>2</sub> to the OVs states, and then to the conduction band (Fig S11d: Mechanism I). Second, the localized electrons on the OVs states can be directly excited to the conduction band of TiO<sub>2</sub> (Fig S11d: Mechanism II). After the localized electrons are trapped by adsorbed O<sub>2</sub>, the OVs are quenched through the second mechanism. In our case, we believe both mechanisms co-exist. However, the dominant excitation pathway is inferred to be the first one, based on the slightly decreased OVs in Ru/TiO<sub>2-x</sub> after multiple photocatalytic toluene oxidation.

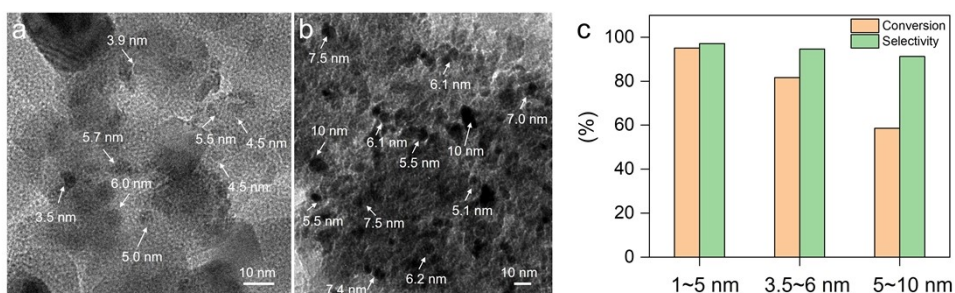

**Fig. S12** Preparation of larger Ru nanoparticles on TiO<sub>2-x</sub> with size of (a) 3.5~6.0 nm, and (b) 5.0~10 nm. (c) Effect of the Ru particle size on the conversion efficiency and selectivity for toluene oxidation into benzoic acid.

We prepared Ru nanoparticles with larger diameters from 3.5 nm to 6 nm, and from 5.0 nm to 10.0 nm by increasing the thermal reduction time of Ru<sub>3</sub>(CO)<sub>12</sub> during the Ru/TiO<sub>2-x</sub> synthesis (Fig. S12a and S12b). Increasing the Ru nanoparticle size led to the decrease of photocatalytic toluene oxidation activity (Fig. S12c). We reckon that larger Ru nanoparticle size might occupy the OV<sub>s</sub>, inhibit reactants adsorption, and decreases the interfacial area, all of which are disadvantageous for photocatalytic toluene oxidation.

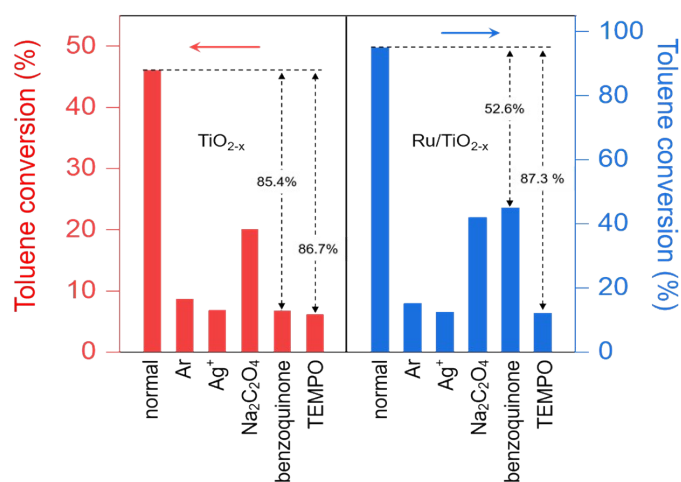

**Fig. S13** Photocatalytic toluene conversion over TiO<sub>2-x</sub> (left) and Ru/TiO<sub>2-x</sub> (right) in the different environments or in the presence of the different trapping species. The concentration of the scavenger is 10 mM. Ag<sup>+</sup> is from the addition of AgNO<sub>3</sub>. Na<sub>2</sub>C<sub>2</sub>O<sub>4</sub> and TEMPO represent sodium oxalate and tetra-methylpiperidine N-oxide, respectively.

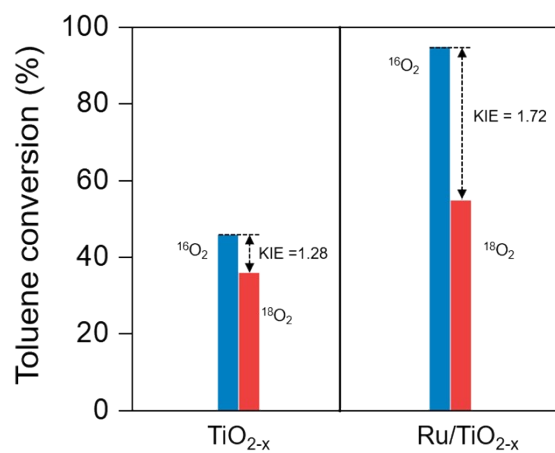

**Fig. S14** Photocatalytic toluene conversion with  $^{16}\text{O}_2$  and  $^{18}\text{O}_2$  as the reactant over  $\text{TiO}_{2-x}$  (left) and  $\text{Ru/TiO}_{2-x}$  (right).

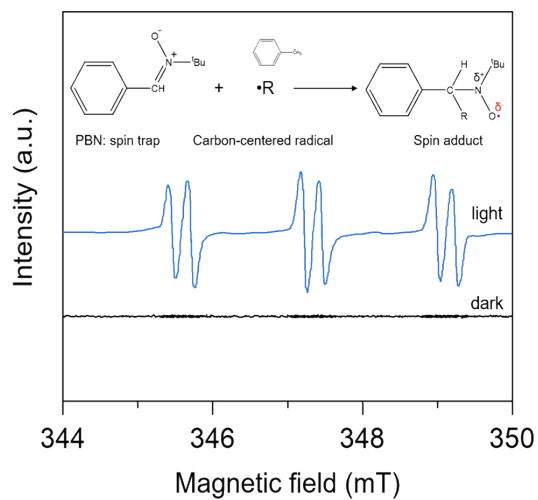

**Fig. S15** Room-temperature EPR spectra of carbon centered radical using N-tert-butyl- $\alpha$ -phenylnitron (PBN) as the spin-trapping reagent with  $\text{Ru/TiO}_{2-x}$  as the catalyst. The inset shows the spin trap reaction of carbon-centred radical with PBN.

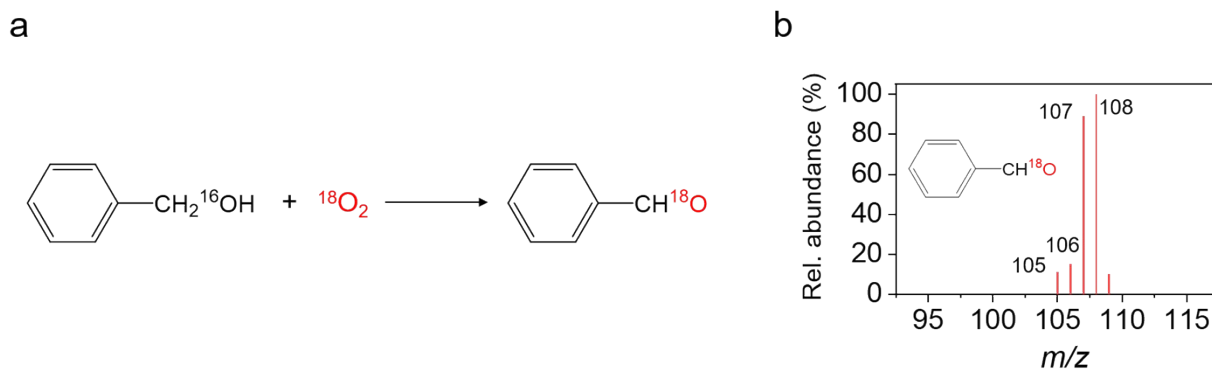

**Fig. S16** (a) Photocatalytic oxidation of benzyl alcohol with  $^{18}\text{O}_2$  as the reactant and Ru/TiO $_{2-x}$  as the catalyst. (b) Mass spectra of corresponding benzaldehyde. Reactions were carried out in 5 ml CH $_3$ CN solution, containing 0.1 mmol benzyl alcohol and 50 mg photocatalyst in 1 MPa  $^{18}\text{O}_2$  under a 300-W Xe lamp with a 400 nm cutoff filter. After 4 hours of reaction, the products distributions and concentrations were determined by GC-MS.

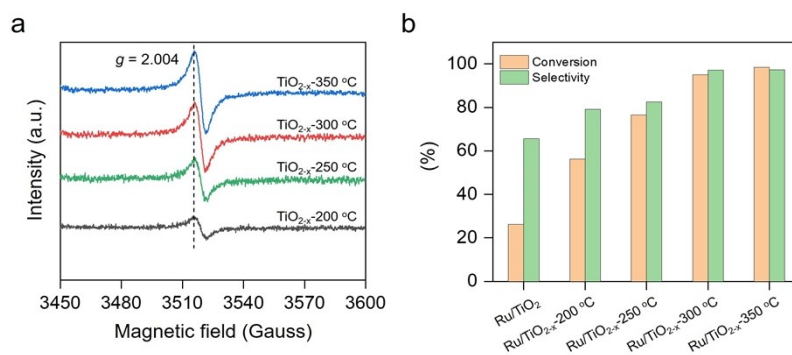

**Fig. S17** (a) EPR spectra of TiO $_{2-x}$  prepared under different annealing temperatures. (b) Influence of OV $s$  (annealing temperature) in Ru/TiO $_{2-x}$  on the conversion and selectivity for photocatalytic toluene oxidation.

To investigate the influence of OV $s$  in Ru/TiO $_{2-x}$  for photocatalytic toluene oxidation, we adjusted the annealing temperature for TiO $_{2-x}$  synthesis from 200 °C to 350 °C with NaBH $_4$  as a reducing reagent. In our study, the default TiO $_{2-x}$  used to synthesize Ru/TiO $_{2-x}$  was prepared at 300 °C. According to the EPR spectra, the symmetrical signal of OV was gradually enhanced along with the annealing temperature increase (Fig. S17a). Subsequently, Ru nanoparticles were deposited onto TiO $_{2-x}$  with different concentrations of OV $s$  through the same method. It was interesting to find along with OV $s$  increase, Ru/TiO $_{2-x}$  displayed both enhanced conversion efficiency and selectivity for toluene oxidation (Fig. S17b). As discussed in our manuscript, the OV $s$  on TiO $_2$  play an important role in facilitating O $_2$  activation into  $\bullet\text{O}_2^-$  that

selectively oxidizes toluene into benzaldehyde. Together with the  $\bullet\text{O}_2$  dissociated from the Ru nanoparticles, benzaldehyde can be further oxidized into benzoic acid (Fig. 5d).

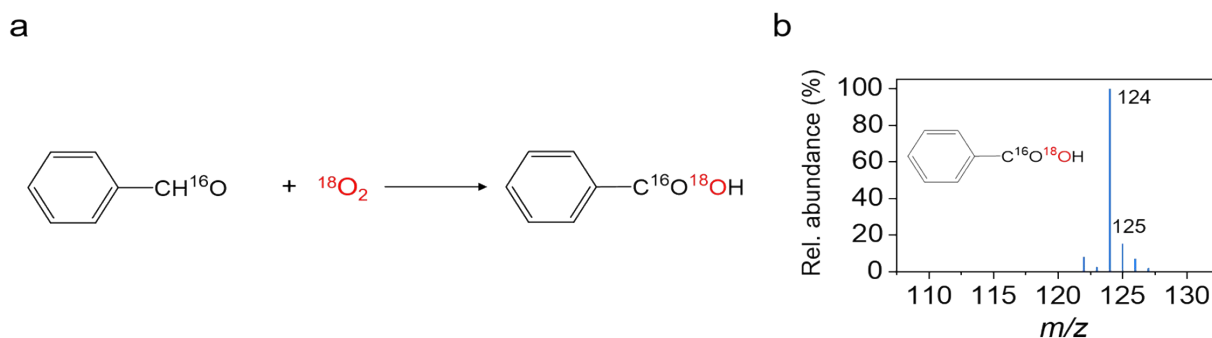

**Fig. S18.** (a) Photocatalytic oxidation of benzaldehyde with  $^{18}\text{O}_2$  as the reactant and Ru/TiO<sub>2-x</sub> as the catalyst. (b) Mass spectra of corresponding benzoic acid. Reactions were carried out in 5 ml CH<sub>3</sub>CN solution, containing 0.1 mmol benzaldehyde and 50 mg photocatalyst in 1 MPa  $^{18}\text{O}_2$  under a 300-W Xe lamp with a 400 nm cutoff filter. After 4 hours of reaction, the products distributions and concentrations were determined by GC-MS.

## Supplementary tables

**Table S1.** Parameters of the time-resolved PL decay curves of the as-prepared photocatalysts\*

| photocatalyst         | decay time (ns) |          |          | relative percentage (%) |       |       | average lifetime | R <sup>2</sup> |
|-----------------------|-----------------|----------|----------|-------------------------|-------|-------|------------------|----------------|
|                       | $\tau_1$        | $\tau_2$ | $\tau_3$ | $B_1$                   | $B_2$ | $B_3$ | (ns)             |                |
| TiO <sub>2</sub>      | 0.72            | 3.53     | -        | 75                      | 25    | -     | 1.42             | 0.95           |
| TiO <sub>2-x</sub>    | 0.81            | 4.02     | -        | 32                      | 68    | -     | 2.99             | 0.98           |
| Ru/TiO <sub>2</sub>   | 0.68            | 3.86     | -        | 64                      | 36    | -     | 1.82             | 0.96           |
| Ru/TiO <sub>2-x</sub> | 0.75            | 3.18     | 19.05    | 21                      | 42    | 37    | 8.54             | 0.93           |

\*The decaying curve can be fitted using a multiexponential function  $I_{PL}(t) = \sum_{i=1}^n A_i e^{-t/\tau_i}$ , where  $I_{PL}(t)$  represents the PL

intensity,  $\tau_i$  the decay time, and  $A_i$  the amplitude. Average lifetime  $\langle \tau \rangle$  is calculated by  $\langle \tau \rangle = \sum_{i=1}^n B_i \tau_i$ , where  $c_i$  is the

relative concentration in the multiexponential decay and is expressed as  $B_i = \frac{A_i \tau_i^2}{\sum_{i=1}^n A_i \tau_i^2}$ .

**Table S2.** The integrated O<sub>2</sub>-TPD peak area

| catalysts             | relative percentage (%)  |              |                              |                           | R <sup>2</sup> |
|-----------------------|--------------------------|--------------|------------------------------|---------------------------|----------------|
|                       | activated O <sub>2</sub> | atomic •O    | surface O <sub>lattice</sub> | bulk O <sub>lattice</sub> |                |
|                       | (50-250 °C)              | (250-400 °C) | (400-550 °C)                 | (550-800 °C)              |                |
| TiO <sub>2</sub>      | 14                       | -            | 35                           | 51                        | 0.997          |
| TiO <sub>2-x</sub>    | 24                       | -            | 52                           | 24                        | 0.993          |
| Ru/TiO <sub>2</sub>   | 19                       | <b>4</b>     | 46                           | 31                        | 0.997          |
| Ru/TiO <sub>2-x</sub> | 20                       | <b>24</b>    | 40                           | 16                        | 0.997          |



**Table S3.** Photocatalytic oxidation of toluene with or without visible light irradiation \*

| entry | catalyst                                                            | light         | conversion (%) |
|-------|---------------------------------------------------------------------|---------------|----------------|
| 1     | Ru/TiO <sub>2-x</sub>                                               | visible       | 95.1           |
| 2     | physical mixture of the Ru nanoparticles<br>with TiO <sub>2-x</sub> | visible       | 52.5           |
| 3     | Ru/TiO <sub>2-x</sub>                                               | no (at 41 °C) | 10.1           |

\*Reactions were carried out in 5 ml CH<sub>3</sub>CN solution, containing 0.1 mmol toluene and 50 mg photocatalyst in 1 MPa O<sub>2</sub>.

After 6 hours of reaction, the products distributions and concentrations were determined by GC-MS.

**Table S4.** Photocatalytic oxidation of toluene by Ru/TiO<sub>2-x</sub> with and without benzoquinone\*

| Entry | photocatalyst         | conversion (%) | benzoquinone | product selectivity (%) |              |              |
|-------|-----------------------|----------------|--------------|-------------------------|--------------|--------------|
|       |                       |                |              | benzyl alcohol          | benzaldehyde | benzoic acid |
| 1     | Ru/TiO <sub>2-x</sub> | 95.1           | no           | 0.6                     | 1.2          | 97.1         |
| 2     | Ru/TiO <sub>2-x</sub> | 45.5           | yes          | 5.8                     | 31           | 61.4         |

\*Reactions were carried out in 5 ml CH<sub>3</sub>CN solution, containing 0.1 mmol toluene and 50 mg photocatalyst in 1 MPa O<sub>2</sub> under a 300-W Xe lamp with a 400 nm cutoff filter. After 6 hours of reaction, the products distributions and concentrations were determined by GC-MS.

**Table S5.** Photocatalytic oxidation of substituted toluenes towards corresponding acids by Ru/TiO<sub>2-x</sub> under visible light\*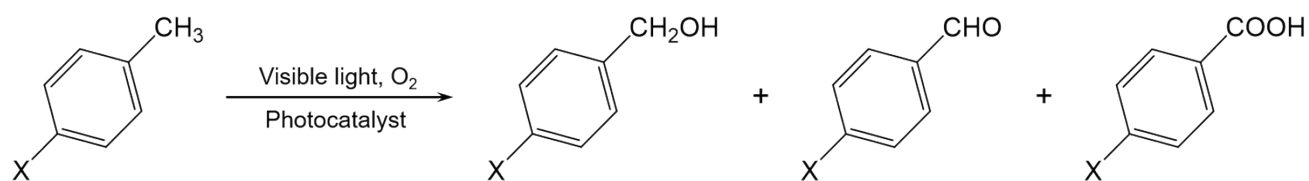

| entry | -X                | time (h) | conversion (%) | selectivity (%) |
|-------|-------------------|----------|----------------|-----------------|
| 1     | -H                | 6        | 95.3           | 97.1            |
| 2     | -OCH <sub>3</sub> | 6        | 94.8           | 95.7            |
| 3     | -CH <sub>3</sub>  | 6        | 96.1           | 95.5            |
| 4     | -F                | 6        | 88.5           | 92.8            |
| 5     | -NO <sub>2</sub>  | 6        | 82.6           | 93.3            |

\*Reactions were carried out in 5 ml CH<sub>3</sub>CN solution, containing 0.1 mmol substrate and 50 mg photocatalyst in 1 MPa O<sub>2</sub> under a 300-W Xe lamp with a 400 nm cutoff filter. After 6 hours of reaction, the products distributions and concentrations were determined by GC-MS.

## Supplemental References

- 1 J. P. Perdew, K. Burke and M. Ernzerhof, *Phys. Rev. Lett.*, 1996, **77**, 3865–3868.
- 2 S. L. Dudarev, G. A. Botton, S. Y. Savrasov, C. J. Humphreys and A. P. Sutton, *Phys. Rev. B*, 1998, **57**, 1505–1509.
- 3 G. Kresse, *Phys. Rev. B*, 1996, **54**, 11169–11186.
- 4 G. Kresse and D. Joubert, *Phys. Rev. B*, 1999, **59**, 1758–1775.
- 5 M. Setvín, U. Aschauer, P. Scheiber, Y.-F. Li, W. Hou, M. Schmid, A. Selloni and U. Diebold, *Science*, 2013, **341**, 988–91.
- 6 A. Tilocca and A. Selloni, *ChemPhysChem*, 2005, **6**, 1911–1916.
- 7 G. Henkelman, B. P. Uberuaga and H. Jónsson, *J. Chem. Phys.*, 2000, **113**, 9901–9904.
- 8 D. W. LYNCH and W. R. HUNTER, in *Handbook of Optical Constants of Solids*, Elsevier, 1998, p. 341.
- 9 M. W. Ribarsky, in *Handbook of Optical Constants of Solids*, Elsevier, 1997, pp. 795–804.
- 10 B. Choudhury and A. Choudhury, *Phys. E Low-dimensional Syst. Nanostructures*, 2014, **56**, 364–371.
- 11 J. M. Sanz, D. Ortiz, R. Alcaraz de la Osa, J. M. Saiz, F. González, A. S. Brown, M. Losurdo, H. O. Everitt and F. Moreno, *J. Phys. Chem. C*, 2013, **117**, 19606–19615.
- 12 X. Meng, T. Wang, L. Liu, S. Ouyang, P. Li, H. Hu, T. Kako, H. Iwai, A. Tanaka and J. Ye, *Angew. Chemie Int. Ed.*, 2014, **53**, 11478–11482.
- 13 H. Yin, Y. Kuwahara, K. Mori, H. Cheng, M. Wen and H. Yamashita, *J. Mater. Chem. A*, 2017, **5**, 8946–8953.
- 14 E. Prodan, *Science (80-. )*, 2003, **302**, 419–422.
- 15 C. Mao, H. Li, H. Gu, J. Wang, Y. Zou, G. Qi, J. Xu, F. Deng, W. Shen, J. Li, S. Liu, J. Zhao and L. Zhang, *Chem*, 2019, **5**, 2702–2717.
- 16 J. Yang, Y. Guo, R. Jiang, F. Qin, H. Zhang, W. Lu, J. Wang and J. C. Yu, *J. Am. Chem. Soc.*, 2018, **140**, 8497–8508.
- 17 H. Li, F. Qin, Z. Yang, X. Cui, J. Wang and L. Zhang, *J. Am. Chem. Soc.*, 2017, **139**, 3513–3521.
